# Supplementary material for: Comparison of Digital PCR and Quantitative PCR with Various SARS-CoV-2 Primer-Probe Sets
Source: PubMed Central journal article supplement (PMC9705847; doi:10.4014/jmb.2009.09006), 2020-12-25
Supplement: jmb-31-3-358-supple.pdf [file jmb-31-3-358-supple.pdf]

**Supplementary Table 1.** Clinical characteristics of laboratory-confirmed patients with COVID-19

|                            | <b>Patient 1</b> | <b>Patient 2</b> | <b>Patient 3</b> | <b>Patient 4</b> | <b>Patient 5</b> |
|----------------------------|------------------|------------------|------------------|------------------|------------------|
| Age (years)/Sex            | 72/M             | 57/M             | 72/F             | 48/M             | 51/F             |
| Fever                      | -                | +                | +                | +                | +                |
| Chills                     | -                | +                | -                | -                | -                |
| Cough                      | +                | +                | +                | -                | +                |
| Dyspnea                    | -                | +                | +                | -                | +                |
| Diarrhea                   | -                | -                | -                | +                | -                |
| <b>Laboratory findings</b> |                  |                  |                  |                  |                  |
| WBC                        | 3,570            | 3,710            | 6,720            | 4,730            | 5,820            |
| Hemoglobin                 | 10.3             | 12.9             | 16.1             | 12.9             | 10.8             |
| Platelet                   | 157,000          | 42,000           | 190,000          | 316,000          | 175,000          |
| AST                        | 23               | 57               | 32               | 34               | 43               |
| ALT                        | 22               | 55               | 13               | 38               | 18               |
| Creatinine                 | 0.83             | 0.77             | 0.55             | 0.31             | 0.38             |
| <b>Used drug</b>           |                  |                  |                  |                  |                  |
| Lopinavir/ritonavir        | +                | +                | +                | +                | +                |
| Hydroxychloroquine         | +                | +                | +                | +                | +                |
| <b>Outcome</b>             | Cured            | Cured            | Cured            | Cured            | Cured            |
| <b>Ct value</b>            | 22.93            | 30.1             | 37.85            | 38.81            | 29.31            |
